## **Timing of blood draws among hospitalized patients:**

### **An evaluation of the electronic health records from a large health care system**

César Caraballo, MD;<sup>1,2\*</sup> Shiwani Mahajan, MD, MHS;<sup>1,3\*</sup> Chenxi Huang, PhD;<sup>1</sup>  
Sanjay Aneja, MD;<sup>1,4</sup> Karthik Murugiah, MD;<sup>1,2</sup> Bobak J. Mortazavi, PhD;<sup>1,5</sup> Yuan Lu, ScD;<sup>1</sup>  
Rohan Khera, MD, MS;<sup>1,2</sup> Harlan M. Krumholz, MD, SM<sup>1,2,6</sup>

<sup>1</sup> Center for Outcomes Research and Evaluation, Yale New Haven Hospital, New Haven, CT

<sup>2</sup> Section of Cardiovascular Medicine, Department of Internal Medicine, Yale School of Medicine, New Haven, CT

<sup>3</sup> Section of General Internal Medicine, Department of Internal Medicine, Yale School of Medicine, New Haven, CT

<sup>4</sup> Department of Therapeutic Radiology, Yale School of Medicine, New Haven, Connecticut

<sup>5</sup> Computer Science & Engineering, Texas A&M University, College Station, TX

<sup>6</sup> Department of Health Policy and Management, Yale School of Public Health, New Haven, CT

\* Drs. Caraballo and Mahajan contributed equally as co-lead authors.

### **Corresponding author:**

Harlan M. Krumholz, MD, SM

195 Church Street, Fifth Floor, New Haven, CT 06510

203-497-1246; [harlan.krumholz@yale.edu](mailto:harlan.krumholz@yale.edu)

## KEY POINTS

**Question:** What are the trends in non-urgent early morning (04:00–06:59) blood draws among non-critically ill hospitalized patients across a large health care system?

**Findings:** This cross-sectional study showed that 38.9% of all blood draws occurred between 04:00–06:59, with only modest differences across age, race and ethnicity, and gender subgroups. The proportion of early morning blood draws increased over the study period from 36.9% to 41.4% ( $P<0.001$ ).

**Meaning:** The proportion of non-urgent early morning blood draws remains persistently high, suggesting a need to redesign hospital care to reduce sleep interruptions from non-urgent interventions.

## ABSTRACT

**Importance:** Early morning blood draws disrupt patients' sleep and adversely affect patient experience.

**Objective:** To describe the trends in non-urgent early morning blood draws in a large health care system.

**Design:** This cross-sectional study analyzed trends in non-urgent early morning (04:00–06:59) blood draws using the electronic medical records of patients hospitalized between November 2016 and October 2019.

**Setting:** The study was done at Yale New Haven Health System, which is Connecticut's largest health care system consisting of 5 hospitals.

**Participants:** We included all blood draw events for hospitalized adult patients ( $\geq 18$  years at the time of admission).

**Main outcome and measures:** We assessed the timing of non-urgent (excluding blood draws performed in the emergency department, critical care units, step-down units, and during the first 24 hours of admission) blood draws among hospitalized patients and determined if the trends of early morning (04:00–06:59) blood draws varied by patient characteristics or over the study duration.

**Results:** Of the 5,676,802 blood draw events included, 38.9% occurred between 04:00–06:59 with only modest differences across age, race and ethnicity, and gender subgroups. The proportion of early morning blood draws increased over the study period from 36.9% to 41.4% ( $P < 0.001$ ). Of the early morning samples, those collected between 04:00–04:59 decreased from 25.6% to 18.5%, those collected between 05:00–05:59 increased from 39.6% to 45.5%, and those collected between 06:00–06:59 increased from 34.6% to 36.0% ( $P < 0.001$ , each).

**Conclusions and relevance:** The proportion of non-urgent early morning blood draws was persistently high over 3 years. There is a need to redesign hospital care to reduce sleep interruptions from non-urgent interventions.

## **BACKGROUND**

Sleep is a key element of patient care and experience.<sup>1</sup> Sleep deprivation among hospitalized patients is an important stressor that can adversely affect their recovery<sup>2-4</sup> and increase their risk of adverse events during hospitalization and after discharge.<sup>1,5</sup> Among the many sources of sleep interruption are early morning blood draws.<sup>6-8</sup> Avoidance of routine non-urgent early morning blood draws represents a potential solution to decrease interruptions in patients' sleep.<sup>9-12</sup> However, little is known about the degree to which blood draw patterns contribute to early morning disruptions and whether there has been recent progress in reducing them.

Accordingly, we leveraged electronic health records to assess the timing of non-urgent blood draws among non-critically ill hospitalized patients across a large health care system. We also aimed to determine if the proportion of blood draws taken early in the morning varies by patients' sociodemographic characteristics and if it changed during the study period.

## **METHODS**

The Yale New Haven Health Joint Data Analytics Team queried electronic health records (EHR) for all blood draw events for hospitalized adult patients ( $\geq 18$  years at the time of admission) in the Yale-New Haven Health System (YNHHS) between November 1, 2016 and October 31, 2019. The YNHHS is Connecticut's largest health care system consisting of 5 hospitals that use a secure, centralized EHR system designed by the Epic Corporation. We excluded blood draws performed in the emergency department, critical care units, step-down units, and during the first 24 hours of admission to avoid 'urgent' blood draws obtained during the initial evaluation of the patient. Patients' characteristics (age, gender, race, ethnicity) were

obtained from the medical records. The Institutional Review Board at Yale University exempted the study from review as we used de-identified information.

## **Statistical Analysis**

We evaluated differences in timing of blood draw across patient subgroups using the Kruskal-Wallis test. We then compared the proportion of samples collected between 04:00–06:59, as these were most likely taken for routine daily labs to have results available during morning rounds, by patients’ characteristics using the chi-squared test. To assess trends in the proportion of samples taken during early morning hours over the study period, we used autoregressive integrated moving average models using a 1-month correlation, which accounts for the serial correlation of the monthly proportion of samples taken during those hours. Separately, we estimated the absolute difference in the percentage of early morning blood draws between November 2016 and October 2019 using a z-test.

All analyses were performed on sample-level data using Stata version 17.0. The statistical code is publicly available at <https://doi.org/10.5281/zenodo.6787745>. Two-sided P values <0.05 were considered statistically significant.

## **RESULTS**

We obtained data from 9,274,592 blood draws from 99,968 patients hospitalized between November 2016 and October 2019 across YNHHS. Of these, we excluded 2,729,993 samples taken within the first 24 hours after admission, 835,521 samples taken in the emergency department, critical care units, or step-down units, and 32,276 samples whose date and time of collection were outside a patient’s hospitalization period (eFigure 1). The final study sample

included 5,676,802 blood draws from 79,353 unique patients (mean [SD] age 59.1 [19.9] years, 55.4% women, 67.6% White, 16.1% Black, and 11.5% Latino/Hispanic). At a sample level, 45.9% of samples were taken from women, 66.4% from White individuals, 19.5% from Black individuals, and 10.4% from Latino/Hispanic individuals.

Of the total samples, 2,206,441 (38.9%) were collected between 04:00 and 06:59. Of those, 505,973 (22.9%) were taken from 04:00 to 04:59; 937,186 (42.5%) from 05:00 to 05:59; and 763,282 (34.6%) from 06:00 to 06:59 (Figure 1; eFigures 2 and 3). There were modest but statistically significant differences in the percentage of early morning blood draws across age, race and ethnicity, and gender subgroups (Table). For example, early morning blood draws comprised 41.3%, 39.6%, 37.6%, and 38.4% of all daily blood draws collected from patients aged 18–35 years, 36–65 years, 66–85 years, and >85 years, respectively.

From November 2016 to October 2019, the monthly proportion of blood samples taken between 04:00 and 06:59 increased from 36.9% to 41.4% ( $P<0.001$ ). Of these, as shown in Figure 2, the proportion of samples taken between 04:00 and 04:59 declined over the study period from 25.6% to 18.5% ( $P<0.001$ ) at an average monthly rate of -0.19 percentage points (95% CI: -0.25, -0.13;  $P<0.001$  for trend); the proportion taken between 05:00 and 05:59 increased from 39.6% to 45.5% ( $P<0.001$  for change; +0.16 points per month [95% CI: 0.14, 0.18;  $P<0.001$  for trend]); and the proportion taken between 06:00 and 06:59 increased from 34.6% to 36.0% ( $P<0.001$  for change; +0.03 points per month [95% CI: -0.04, 0.09;  $P=0.40$  for trend]). Temporal trends by patient characteristics are shown in eFigure 4.

## DISCUSSION

This single-center study, including more than 5 million blood samples from non-critically ill patients, found that the proportion of early morning blood draws was persistently high over 3 years, reaching nearly 4 in 10 daily blood draws at the end of the study period. This was mainly driven by an increase in samples taken between 5:00 and 7:00am, whereas samples taken between 4:00 and 4:59am decreased in prevalence. Such a distribution of blood draw timing occurred across patients with different sociodemographic characteristics, including older individuals who are at highest risk of delirium from sleep deprivation.

Our study expands the literature by showing that in a large health care system with a diverse study population, the proportion of non-urgent blood draws taken in the early morning is increasing and consistently high across different patient characteristics. To our knowledge, this is the largest and most recent descriptive study on blood draw timing.

The findings have implications for inpatient care and future research. Hospitalized patients experience interruptions of sleep mostly due to medical interventions and environmental factors,<sup>6,7</sup> and we found that early morning phlebotomies, one of the main stressors, were persistently highly prevalent. As we strive to improve quality of care and patient experience, designing and implementing patient-centered care must include strategies to limit non-urgent tests during sleep hours. For instance, there is a wide margin for redistribution of non-urgent blood draws during the entire day rather than concentrated in a 3-hour period in the early morning, and physicians must be mindful of which patients really need early morning labs when placing orders. This is especially relevant for vulnerable elderly patients in whom sleep interruptions may easily precipitate delirium, an indicator of health care quality in this population,<sup>13</sup> and increase the risk of post-hospital syndrome.<sup>1</sup>



However, early morning draws have an important role in patient care. During morning rounds, clinical teams often deem it necessary to have laboratory results available to assess patients' most recent health status. Although some studies have shown that avoiding performing blood draws in the early morning is a feasible strategy and may result in increased patient satisfaction,<sup>9,10,14,15</sup> larger studies are needed to assess if doing so has untoward effects on quality of care or length of stay.

Our study has limitations. First, we used data from a single health care system, which may limit generalizability of the findings. Second, we identified non-urgent blood draws by excluding blood draws done for patients in the emergency department, step-down units, critical care units, and during the first 24 hours of admission, and occasionally there may be critically ill patients on the medical and surgical floors that need an urgent blood draw.

In conclusion, the proportion of non-urgent blood draws taken in the early morning in a large health care system was persistently high over 3 years and constituted nearly half of total daily blood draws at the end of the study. There is a need to redesign hospital care to reduce sleep interruptions from non-urgent interventions.

## ACKNOWLEDGEMENTS

**Funding:** This study did not receive external funding.

**Disclosures:** In the past three years, Harlan Krumholz received expenses and/or personal fees from UnitedHealth, Element Science, Aetna, Reality Labs, Tesseract/4Catalyst, F-Prime, the Siegfried and Jensen Law Firm, Arnold and Porter Law Firm, and Martin/Baughman Law Firm. He is a co-founder of Refactor Health and HugoHealth, and is associated with contracts, through Yale New Haven Hospital, from the Centers for Medicare & Medicaid Services and through Yale University from Johnson & Johnson. Bobak Mortazavi received expenses and/or personal fees from HugoHealth, as a consultant. Dr. Khera receives support from the National Heart, Lung, and Blood Institute of the National Institutes of Health under award, 1K23HL153775, and is a founder of Evidence2Health, a precision health and digital health analytics platform. The other co-authors report no potential conflicts of interest.

## REFERENCES

1. Krumholz HM. Post-hospital syndrome--an acquired, transient condition of generalized risk. *N Engl J Med*. 2013;368(2):100-102.
2. DePietro RH, Knutson KL, Spampinato L, et al. Association between inpatient sleep loss and hyperglycemia of hospitalization. *Diabetes Care*. 2017;40(2):188-193.
3. Stewart NH, Arora VM. Sleep in hospitalized older adults. *Sleep Med Clin*. 2018;13(1):127-135.
4. Miner SE, Pahal D, Nichols L, Darwood A, Nield LE, Wulffhart Z. Sleep disruption is associated with increased ventricular ectopy and cardiac arrest in hospitalized adults. *Sleep*. 2016;39(4):927-935.
5. Caraballo C, Dharmarajan K, Krumholz HM. Post hospital syndrome: is the stress of hospitalization causing harm? *Rev Esp Cardiol (Engl Ed)*. 2019;72(11):896-898.
6. Grossman MN, Anderson SL, Worku A, et al. Awakenings? Patient and hospital staff perceptions of nighttime disruptions and their effect on patient sleep. *J Clin Sleep Med*. 2017;13(2):301-306.
7. Wesselius HM, van den Ende ES, Alsmas J, et al. Quality and quantity of sleep and factors associated with sleep disturbance in hospitalized patients. *JAMA Intern Med*. 2018;178(9):1201-1208.
8. Dobing S, Frolova N, McAlister F, Ringrose J. Sleep quality and factors influencing self-reported sleep duration and quality in the general internal medicine inpatient population. *PLoS One*. 2016;11(6):e0156735.

9. Sorita A, Patterson A, Landazuri P, et al. The feasibility and impact of midnight routine blood draws on laboratory orders and processing time. *Am J Clin Pathol*. 2014;141(6):805-810.
10. Ramarajan V, Chima HS, Young L. Implementation of later morning specimen draws to improve patient health and satisfaction. *Lab Med*. 2015;47(1):e1-e4.
11. Tamrat R, Huynh-Le MP, Goyal M. Non-pharmacologic interventions to improve the sleep of hospitalized patients: a systematic review. *J Gen Intern Med*. 2014;29(5):788-795.
12. Najafi N, Robinson A, Pletcher MJ, Patel S. Effectiveness of an analytics-based intervention for reducing sleep interruption in hospitalized patients: a randomized clinical trial. *JAMA Intern Med*. 2022;182(2):172-177.
13. Inouye SK, Westendorp RG, Saczynski JS. Delirium in elderly people. *Lancet*. 2014;383(9920):911-922.
14. Tapaskar N, Kilaru M, Puri TS, et al. Evaluation of the order SMARTT: an initiative to reduce phlebotomy and improve sleep-friendly labs on general medicine services. *J Hosp Med*. 2020;15(8):479-482.
15. Ramazani SN, Gottfried JA, Kaissi M, et al. Improving the timing of laboratory studies in hospitalized children: a quality improvement study. *Hosp Pediatr*. 2021;11(7):670-678.

## FIGURE LEGENDS

**Figure 1.** Hourly distribution of blood draws in a 24-hour period.

This figure shows the percent of total daily blood draws performed in 1-hour blocks. Early morning blood draws were defined as those performed between 04:00 and 06:59. Data source are all non-urgent blood draws from Yale New Haven Health System patients hospitalized between November 2016 and October 2019 (details in Methods section). Hourly distribution of daily blood draws by patient characteristics is shown in eFigure 3.

**Figure 2.** Temporal trends of early morning blood draws.

In the top panel, the denominator is all samples collected in a 24-hour period. In the bottom panel, the denominator is all samples taken between 04:00 and 06:59 (early morning). Temporal trends in early morning samples stratified by patient characteristics are shown in eFigure 4.

**Table.** Distribution of timing of blood draw, overall and by characteristics of patients from whom samples were taken.

|                  | Median timing of early morning samples <sup>a</sup> (P25–P75) | % of early morning samples (% of daily total) |             |             |                  |
|------------------|---------------------------------------------------------------|-----------------------------------------------|-------------|-------------|------------------|
|                  |                                                               | 04:00–04:59                                   | 05:00–05:59 | 06:00–06:59 | All: 04:00–06:59 |
| <b>Total</b>     | 05:39 (05:03–06:13)                                           | 22.9 (8.9)                                    | 42.5 (16.5) | 34.6 (13.5) | 100 (38.9)       |
| <b>By age</b>    |                                                               |                                               |             |             |                  |
| 18–35            | 05:43 (05:07–06:13)                                           | 20.8 (8.6)                                    | 42.9 (17.7) | 36.3 (15.0) | 100 (41.3)       |
| >35–65           | 05:38 (05:03–06:11)                                           | 22.9 (9.1)                                    | 43.7 (17.3) | 33.4 (13.2) | 100 (39.6)       |
| >65–85           | 05:38 (05:02–06:13)                                           | 23.7 (8.9)                                    | 41.7 (15.7) | 34.5 (13.0) | 100 (37.6)       |
| >85              | 05:45 (05:05–06:21)                                           | 21.7 (8.3)                                    | 38.0 (14.6) | 40.4 (15.5) | 100 (38.4)       |
| <b>By race</b>   |                                                               |                                               |             |             |                  |
| White            | 05:38 (05:02–06:12)                                           | 23.6 (9.4)                                    | 42.5 (17.0) | 33.9 (13.5) | 100 (39.9)       |
| Black            | 05:42 (05:07–06:17)                                           | 20.8 (7.5)                                    | 41.2 (14.8) | 37.9 (13.6) | 100 (35.9)       |
| Other            | 05:38 (05:04–06:10)                                           | 22.8 (9.1)                                    | 43.9 (17.4) | 33.2 (13.2) | 100 (39.7)       |
| Latino/Hispanic  | 05:39 (05:04–06:12)                                           | 22.1 (8.3)                                    | 43.7 (16.3) | 34.2 (12.8) | 100 (37.4)       |
| <b>By gender</b> |                                                               |                                               |             |             |                  |
| Female           | 05:39 (05:03–06:14)                                           | 22.8 (9.1)                                    | 41.9 (16.6) | 35.3 (14.0) | 100 (39.7)       |
| Male             | 05:38 (05:03–06:12)                                           | 23.1 (8.8)                                    | 43.0 (16.4) | 33.9 (13.0) | 100 (38.2)       |

<sup>a</sup>Early morning samples were defined as blood draws performed between 4:00am and 6:59am. Data are presented as median with percentiles 25 and 75 in parentheses, and proportion of early morning samples with proportion of total blood draws in parentheses (i.e., the denominator of proportions shown in parentheses are all samples taken in a 24-hour period). Differences in median timing of blood draw were tested using the Kruskal-Wallis test. Differences in proportion of samples were tested using the chi-squared test. P value <0.001 for each category in each column.

Figure 1.

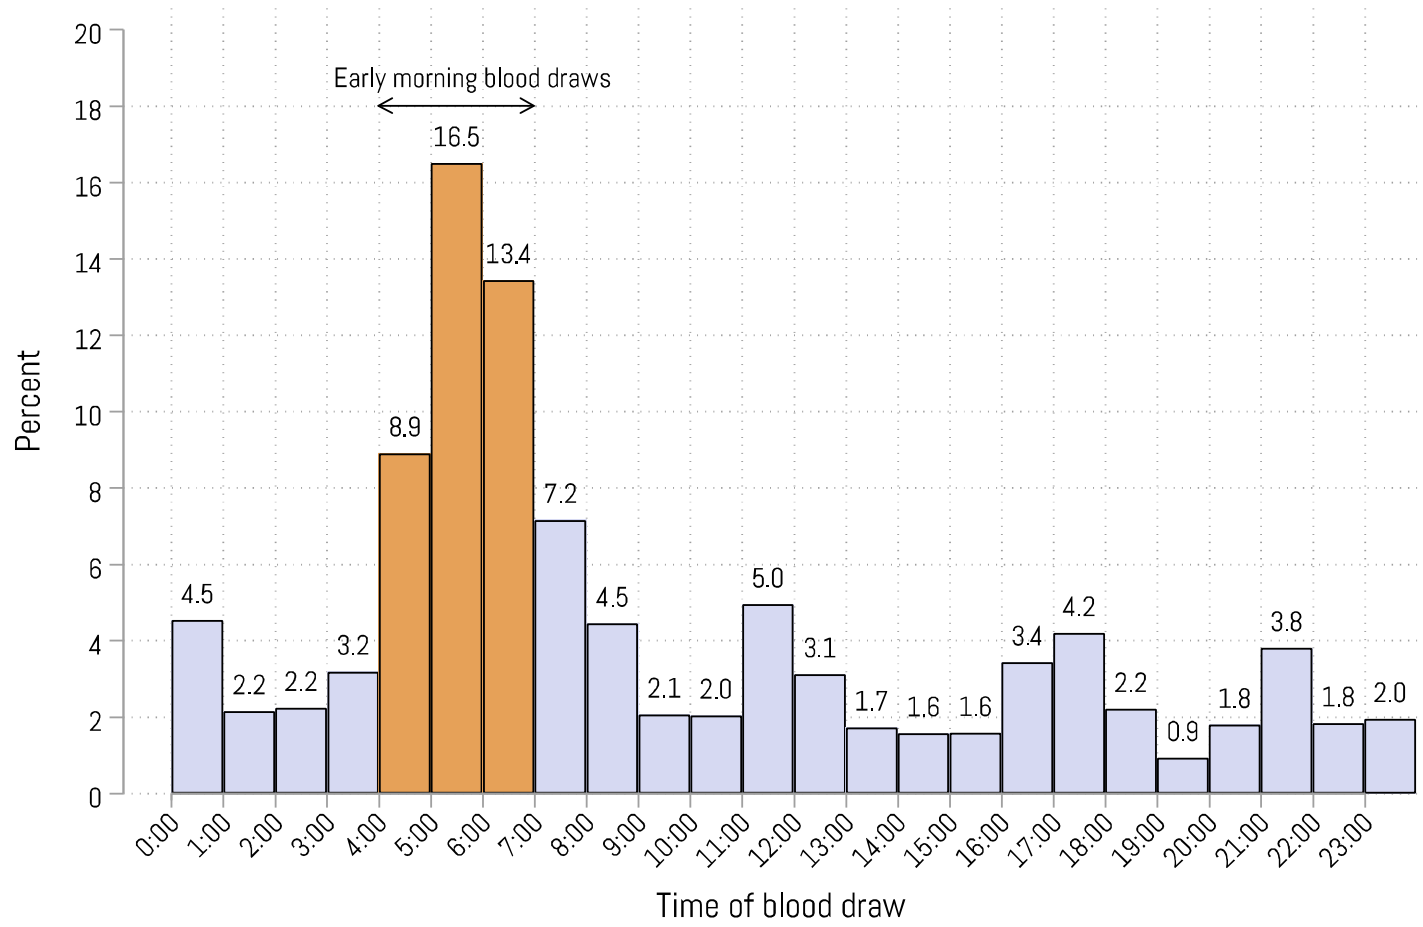

Figure 2.

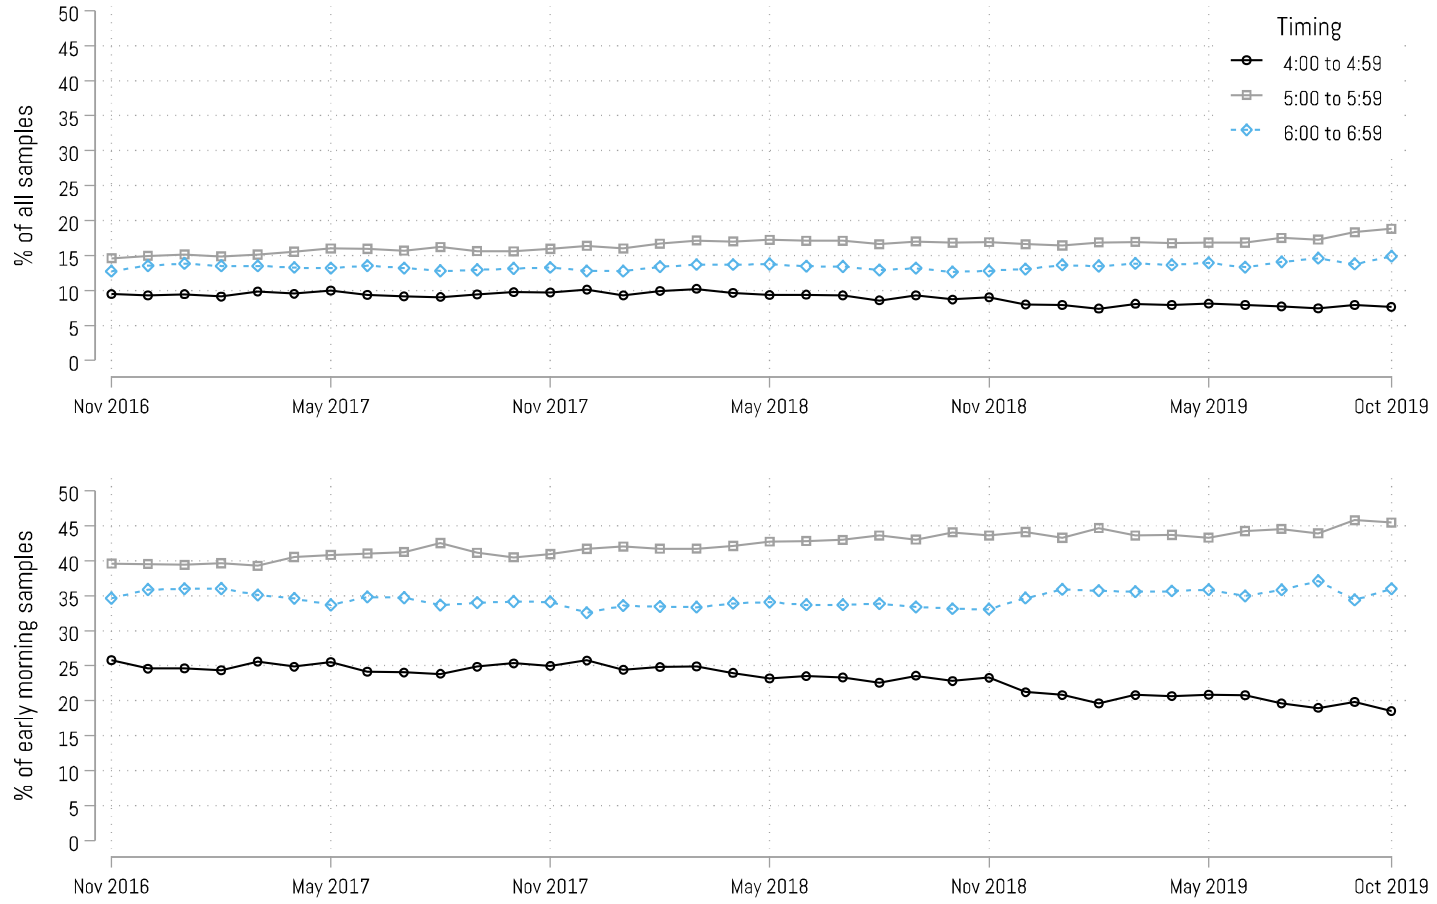

Source: https://medrxiv.org/content/10.1101/2022.07.07.22277369v1.full.pdf
